# Supplementary material for: Magnetic signatures of 120 K superconductivity at interfaces in La2CuO4+δ
Source: Royal Society of Chemistry journal article supplement (doi:10.1039/c9nr04996g), 2020-01-01
Supplement: c9nr04996g1.pdf [file c9nr04996g1.pdf]

## Supplementary Information

# Magnetic signatures of 120 K superconductivity at interfaces in $\text{La}_2\text{CuO}_{4+\delta}$

*Eun-Mi Choi<sup>1,\*</sup>, Bonan Zhu<sup>1,\*</sup>, Ping Lu<sup>2</sup>, John Feighan<sup>1</sup>, Xing Sun<sup>3</sup>, Haiyan Wang<sup>3</sup>, and Judith L. MacManus-Driscoll<sup>1</sup>*

1. Department of Materials Science & Metallurgy, University of Cambridge, 27 Charles Babbage Road, Cambridge, CB3 0FS, United Kingdom.

2. Sandia National Laboratories, Albuquerque, New Mexico 87185, United States.

3. Materials Engineering, Purdue University, West Lafayette, IN, 47907, United States.

### Corresponding Author

\*Correspondence: Dr. Eun-Mi Choi and Mr. Bonan Zhu, Department of Materials Science, University of Cambridge, 27 Charles Babbage Road, Cambridge, CB3 0FS, UK

E-mail: emc63@cam.ac.uk and bz240@cam.ac.uk

KEYWORDS: Superconductivity. Superconducting transition. Nanocomposite. Thin film.

**Supplementary Note 1: The diamagnetic Meissner signal of films S1, S2, S3 and S4**

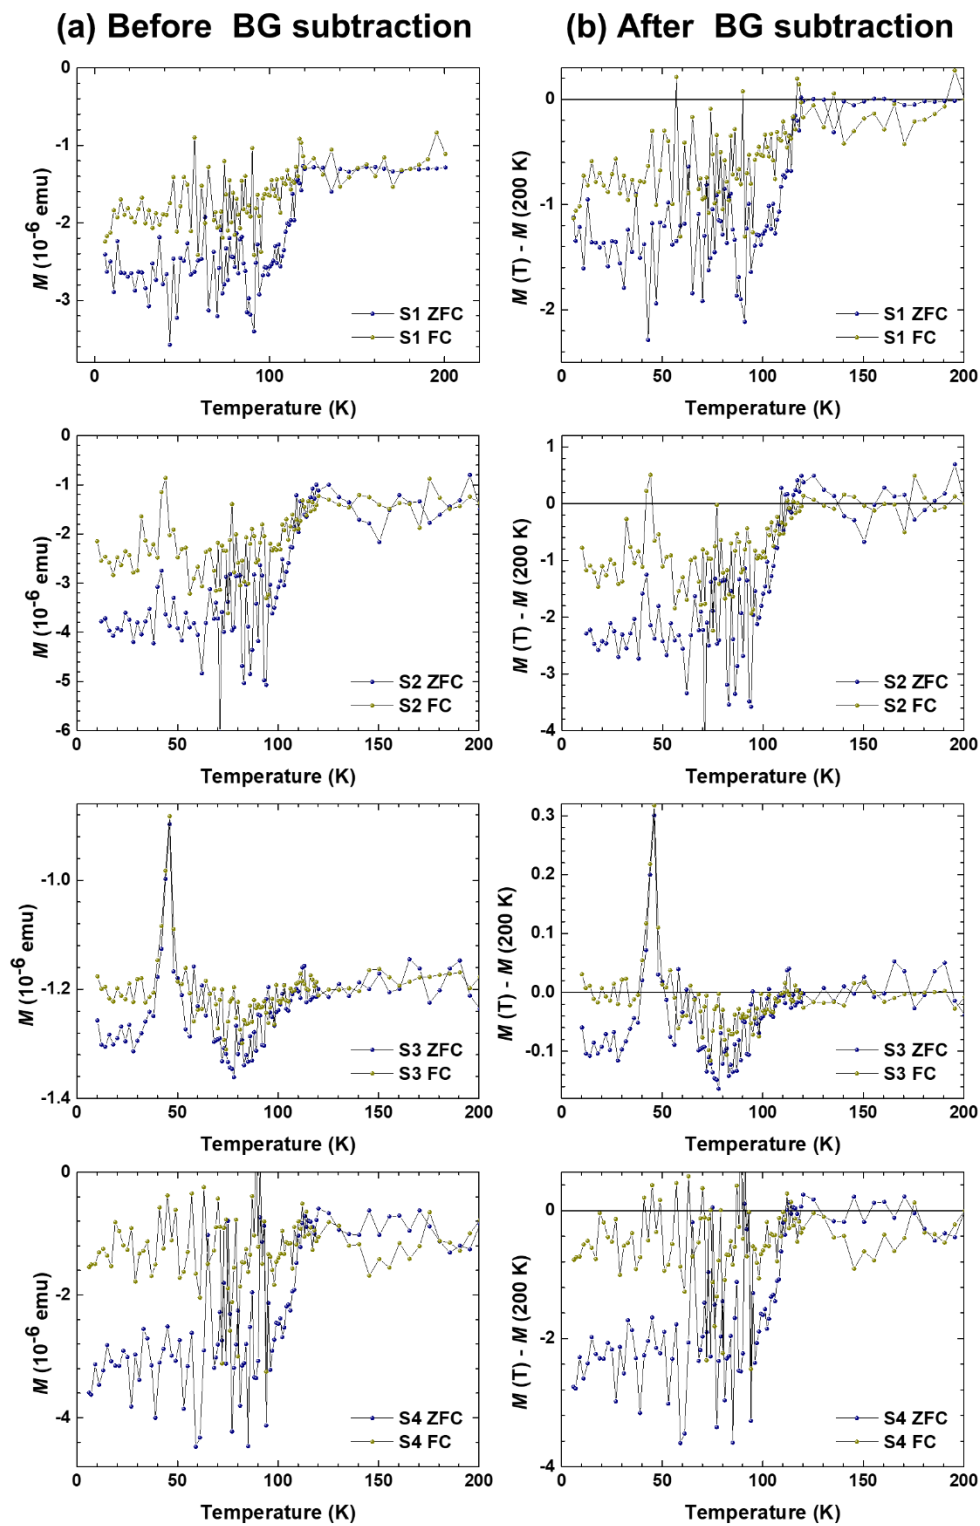

**Figure S1.** The diamagnetic Meissner signal of films S1, S2, S3 and S4 at  $H = 100$  Oe. (a) Before back ground (BG) subtraction. (b) After BG subtraction.

**Supplementary Note 2:** Temperature dependence of magnetisation for an STO substrate

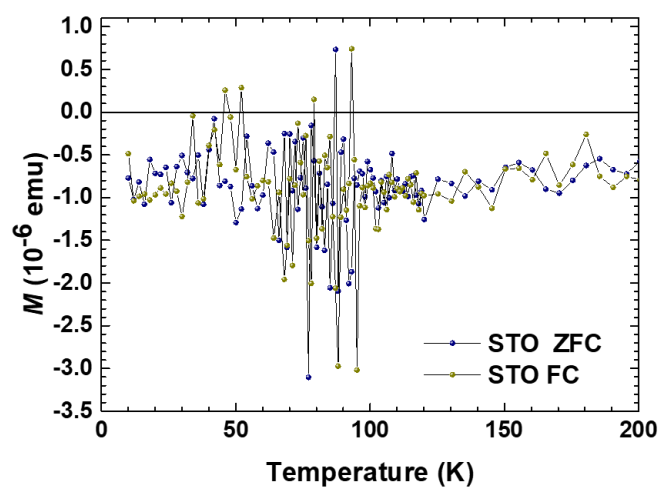

Figure S2 Temperature dependence of magnetization for an STO substrate at  $H = 100$  Oe.
